# Supplementary material for: AL101, a gamma-secretase inhibitor, has potent antitumor activity against adenoid cystic carcinoma with activated NOTCH signaling
Source: PubMed Central journal article supplement (PMC9355983; doi:10.1038/s41419-022-05133-9), 2022-08-05
Supplement: 41419_2022_5133_MOESM1_ESM.pdf [file 41419_2022_5133_MOESM1_ESM.pdf]

**A.**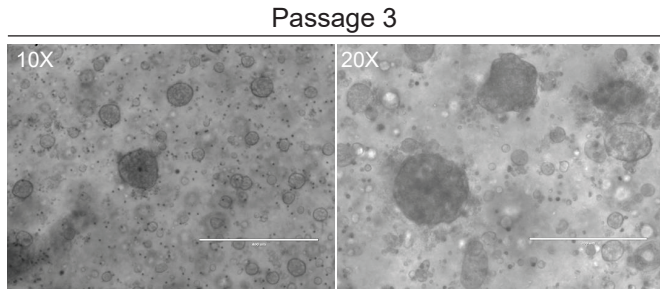**B.**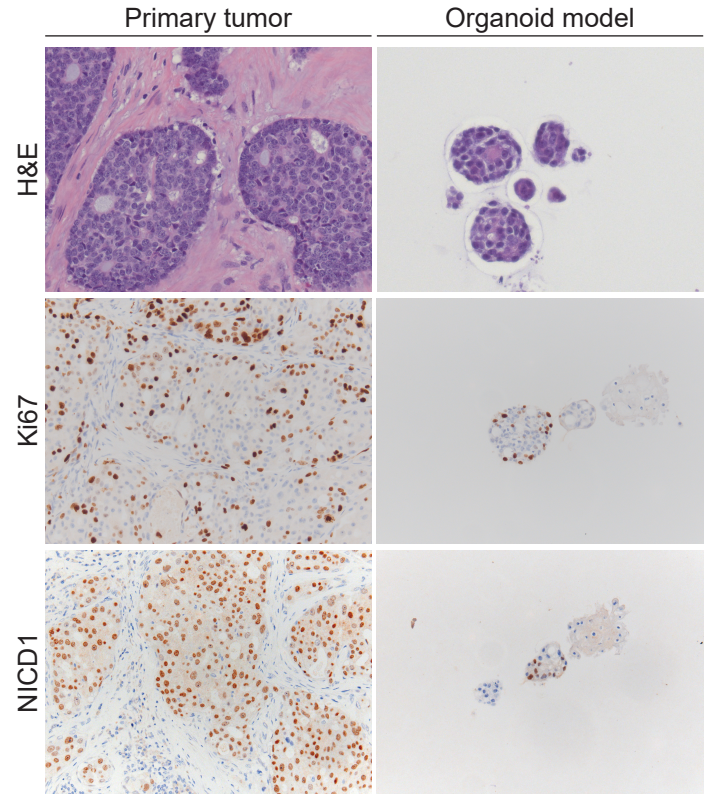

**Supplementary Figure 1. A.** Phase-contrast images showing organoid growth at passage 3, which was used for experiments reported in this study. **B.** Hematoxylin and eosin (H&E), Ki67 and NICD1 staining of an organoid model at passage 3 and a primary ACC tumor it was established from.
