# Supplementary material for: AL101, a gamma-secretase inhibitor, has potent antitumor activity against adenoid cystic carcinoma with activated NOTCH signaling
Source: PubMed Central journal article supplement (PMC9355983; doi:10.1038/s41419-022-05133-9), 2022-08-05
Supplement: 41419_2022_5133_MOESM5_ESM.pdf [file 41419_2022_5133_MOESM5_ESM.pdf]

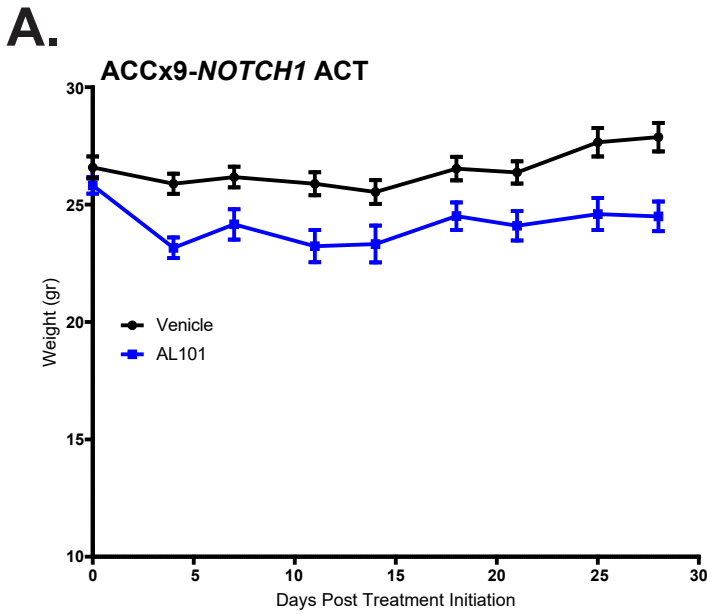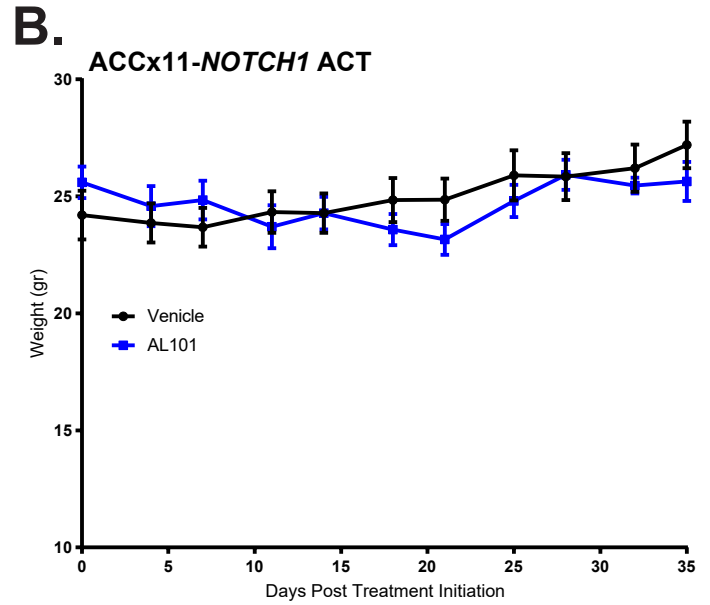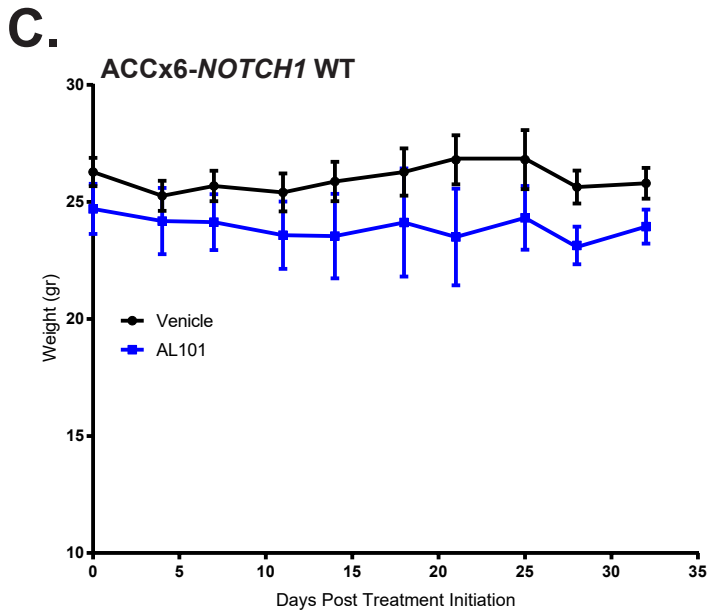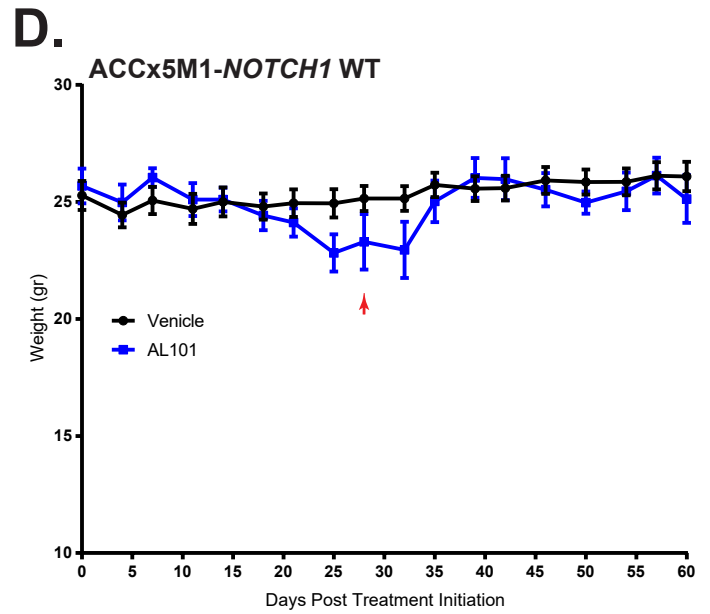

↑ Dosage reduced on day 28 and administered at 5 mg/kg

**Supplementary Figure 5.** Graphs show the average body weights for the PDX models used in this study that were treated with either AL101 (blue curves) or vehicle (black curves). Red arrow - dosage reduced on day 28 and administered at 5 mg/kg. ACT – activated *NOTCH1*. WT – wild type *NOTCH1*.
