# Supplementary material for: AL101, a gamma-secretase inhibitor, has potent antitumor activity against adenoid cystic carcinoma with activated NOTCH signaling
Source: PubMed Central journal article supplement (PMC9355983; doi:10.1038/s41419-022-05133-9), 2022-08-05
Supplement: 41419_2022_5133_MOESM6_ESM.pdf [file 41419_2022_5133_MOESM6_ESM.pdf]

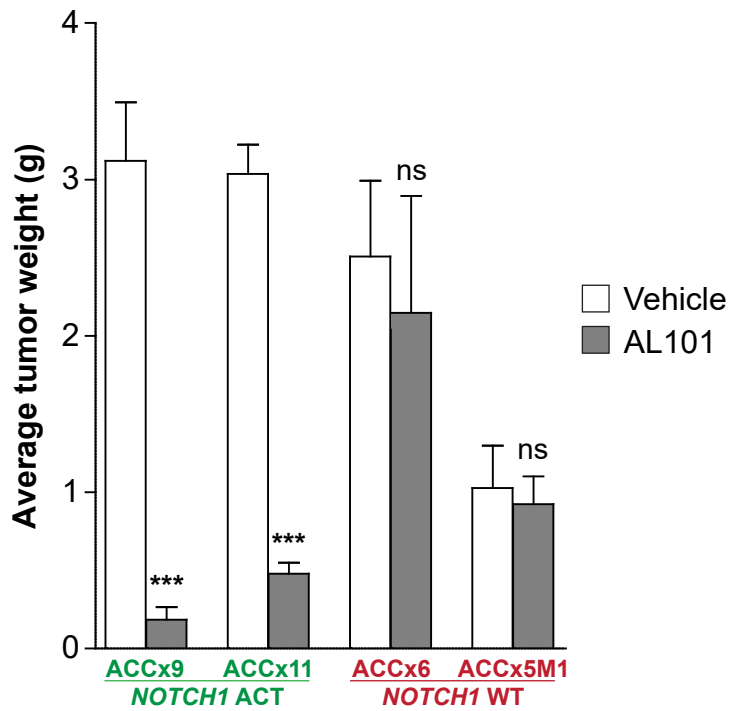

**Supplementary Figure 6.** Mean tumor weights at necropsy ( $\pm$  SD) in four PDX models treated with either vehicle or AL101. \*\*\*  $p < 0.001$ , ns – not significant, ACT – activated *NOTCH1*, WT – wild type *NOTCH1*.
