# Supplementary material for: AL101, a gamma-secretase inhibitor, has potent antitumor activity against adenoid cystic carcinoma with activated NOTCH signaling
Source: PubMed Central journal article supplement (PMC9355983; doi:10.1038/s41419-022-05133-9), 2022-08-05
Supplement: 41419_2022_5133_MOESM7_ESM.pdf [file 41419_2022_5133_MOESM7_ESM.pdf]

**A.**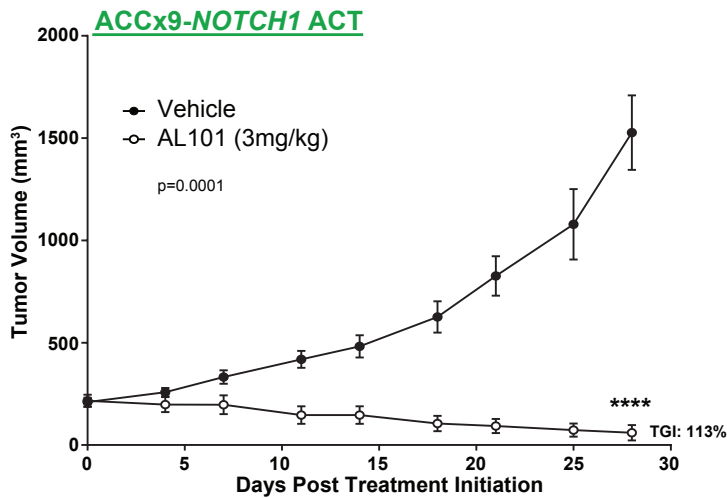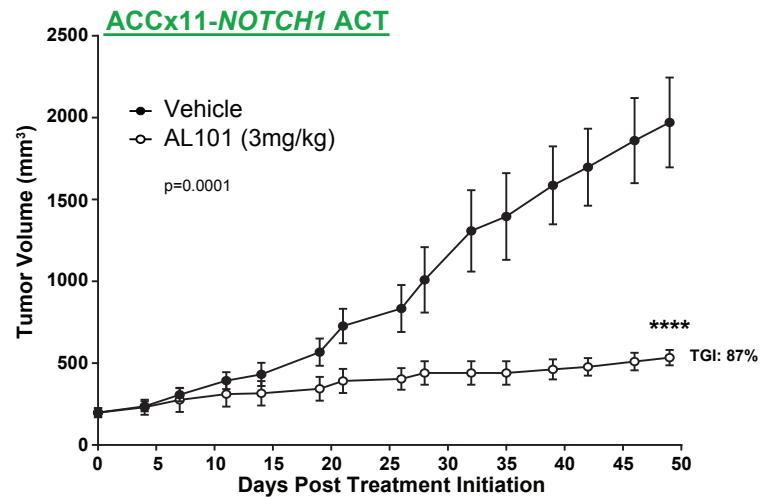**B.**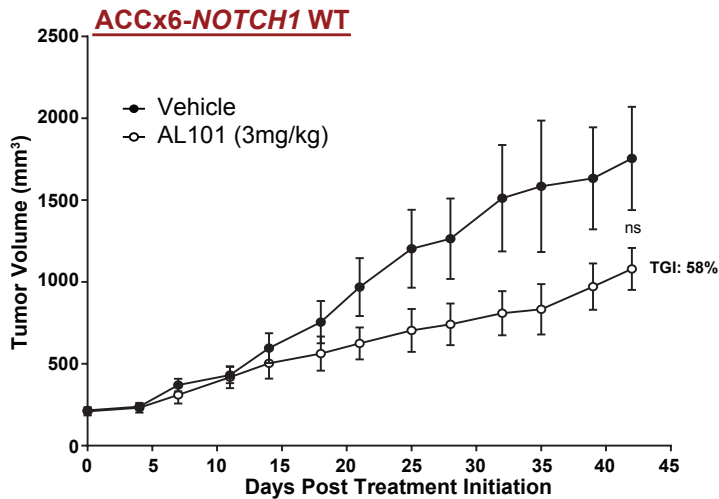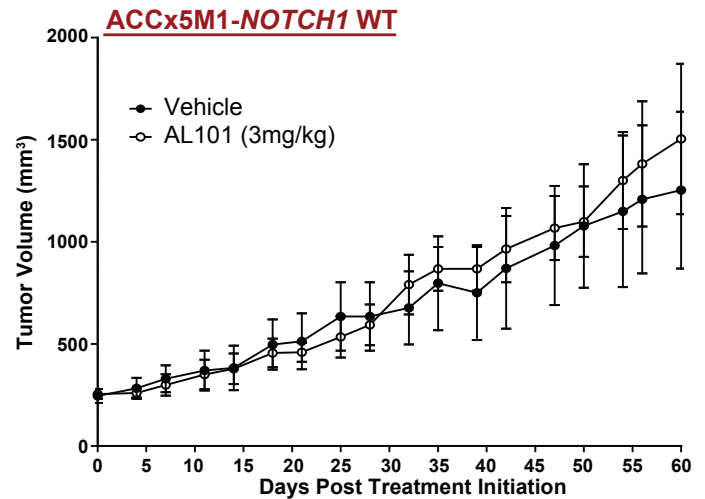

**Supplementary Figure 7.** Two ACC PDX models harboring tumors with *NOTCH1* activating alterations (*NOTCH1*-ACT) (**A**) and two PDX models without *NOTCH1* activating mutations (*NOTCH1*-WT) (**B**) were treated with either 3mg/kg AL101 or vehicle. Graphs show the average tumor volume for five to ten animals  $\pm$  SD. \*\*\*\*  $p < 0.001$ . ACT – activated *NOTCH1*. WT – wild type *NOTCH1*.
