# Supplementary material for: AL101, a gamma-secretase inhibitor, has potent antitumor activity against adenoid cystic carcinoma with activated NOTCH signaling
Source: PubMed Central journal article supplement (PMC9355983; doi:10.1038/s41419-022-05133-9), 2022-08-05
Supplement: 41419_2022_5133_MOESM8_ESM.pdf [file 41419_2022_5133_MOESM8_ESM.pdf]

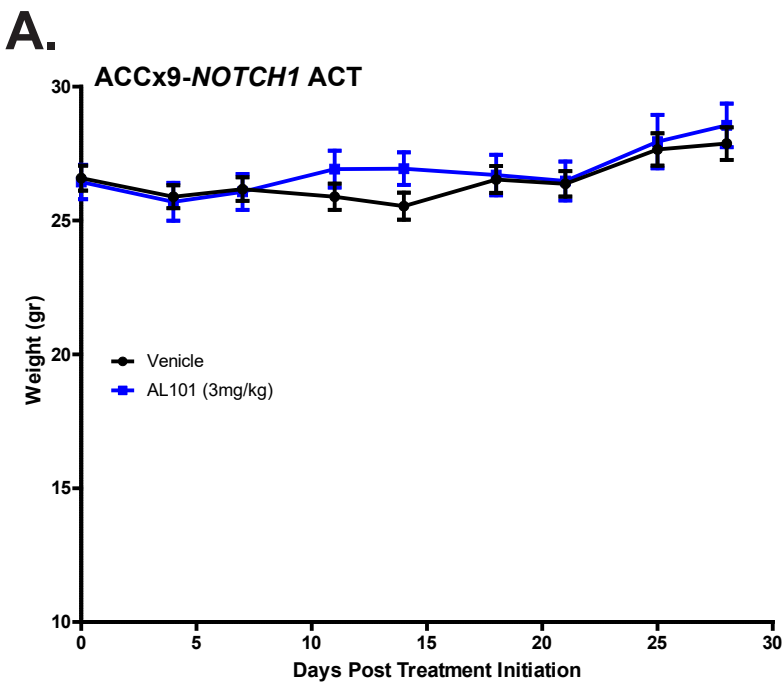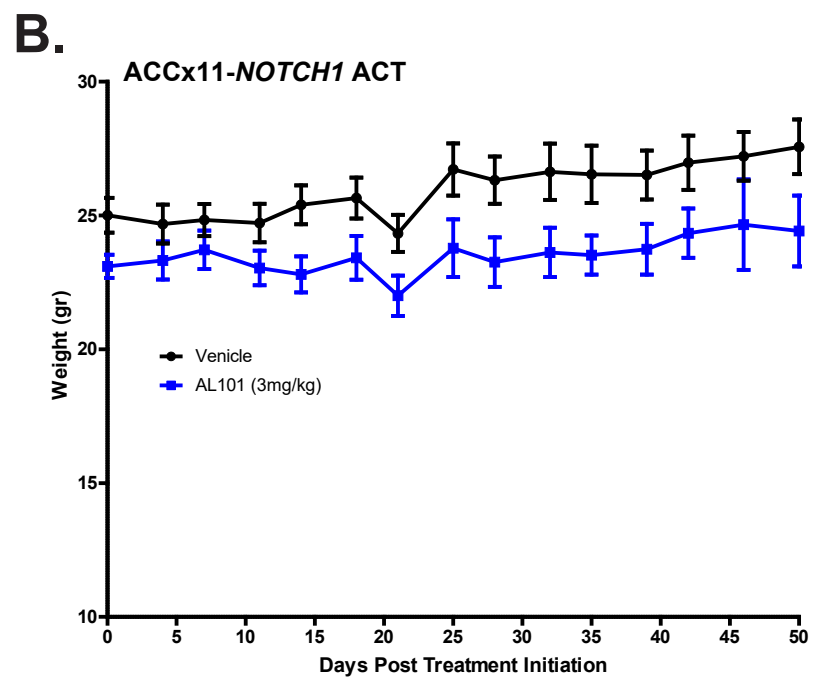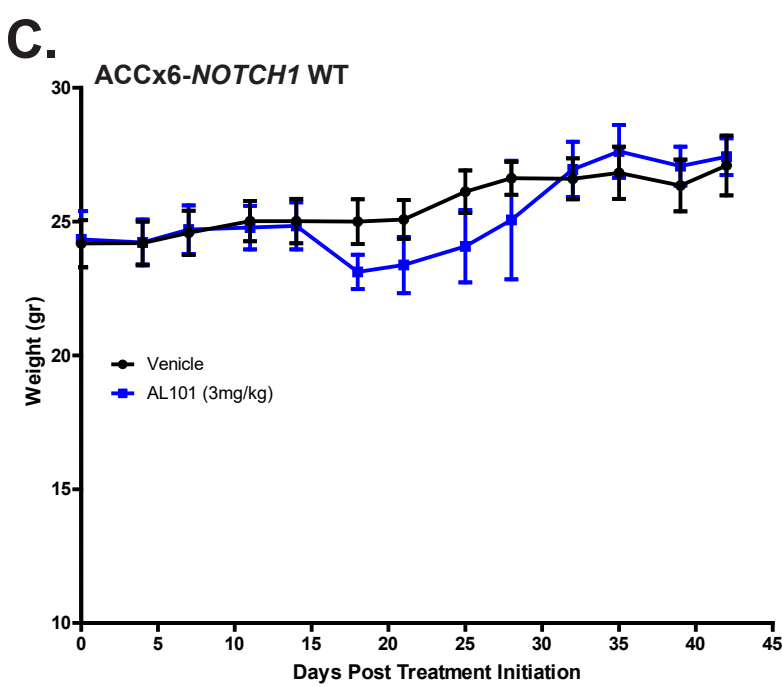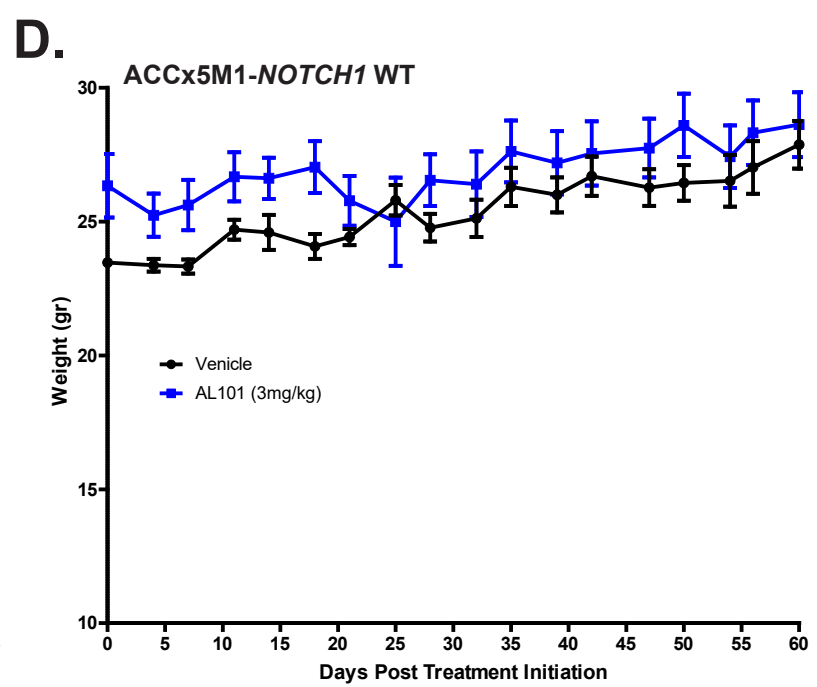

**Supplementary Figure 8.** Graphs show the average body weights for the PDX models treated with either AL101 (3 mg/kg) or vehicle (black curves). ACT – activated *NOTCH1*. WT – wild type *NOTCH1*.
