# Supplementary material for: AL101, a gamma-secretase inhibitor, has potent antitumor activity against adenoid cystic carcinoma with activated NOTCH signaling
Source: PubMed Central journal article supplement (PMC9355983; doi:10.1038/s41419-022-05133-9), 2022-08-05
Supplement: 41419_2022_5133_MOESM9_ESM.pdf [file 41419_2022_5133_MOESM9_ESM.pdf]

A.

NOTCH1 ACT

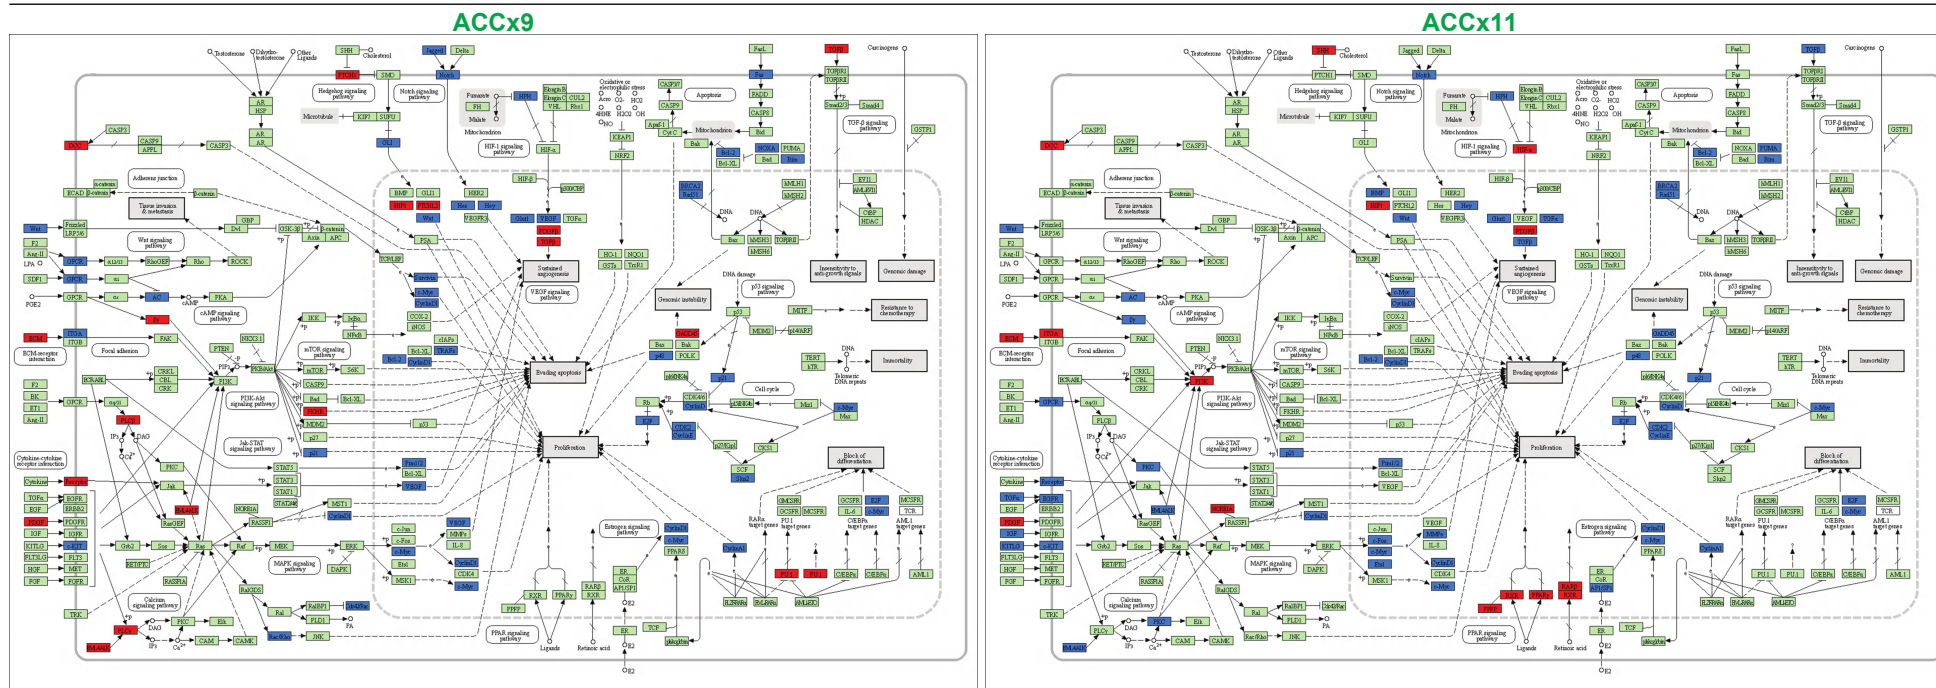

B.

NOTCH1 WT

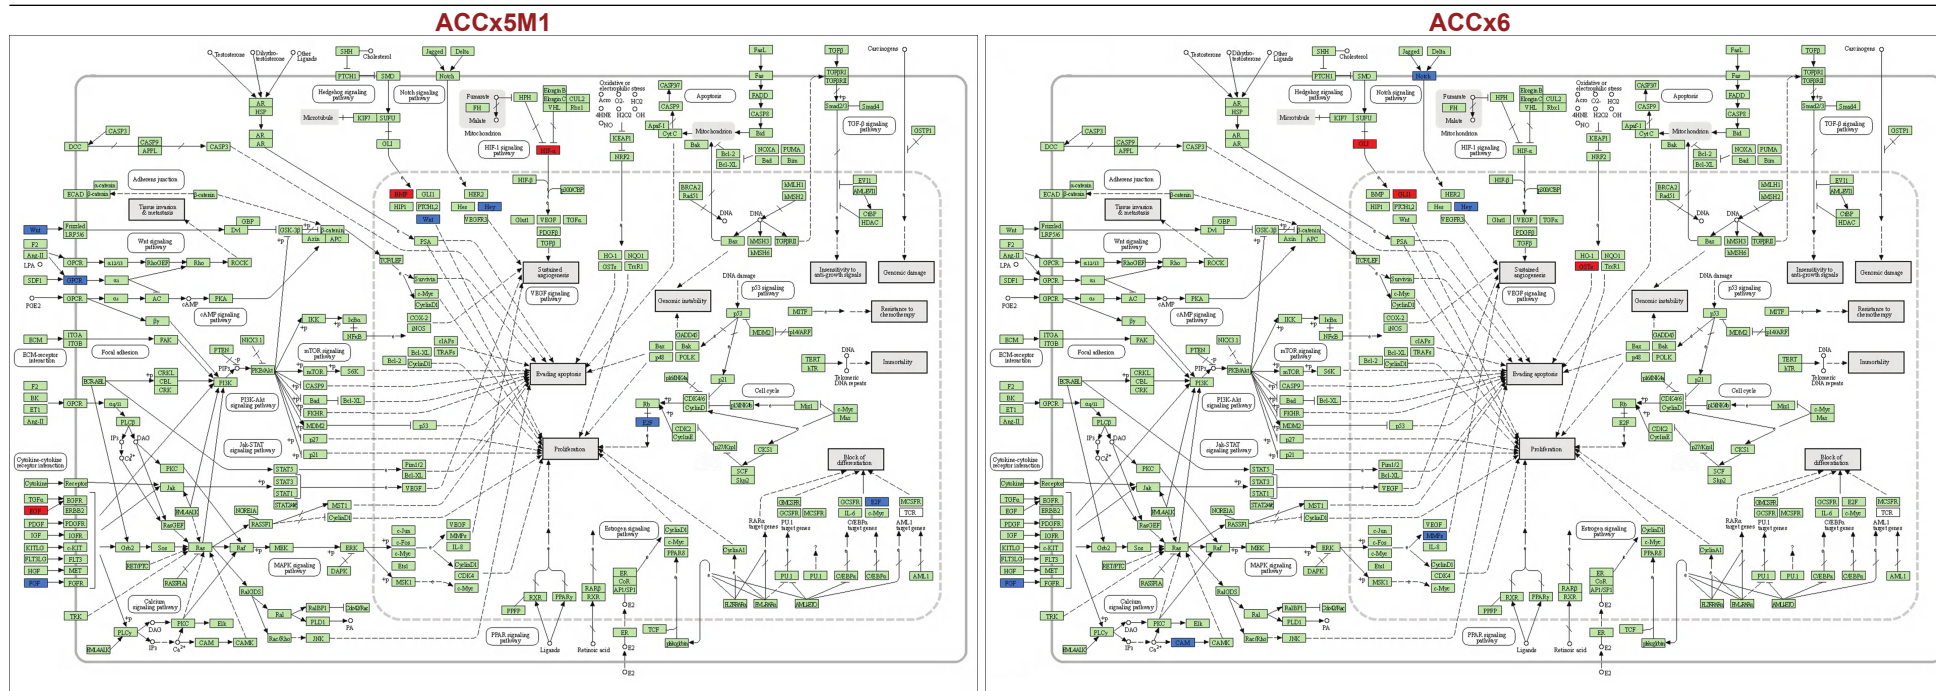

**Supplementary Figure 9.** Enrichment of AL101-induced differentially expressed genes in “pathways in cancer” (KEGG ID: hsa05200). Down-regulated genes are colored in blue. Up-regulated genes are colored in red. **A.** ACCx11 and ACCx9 tumors. **B.** ACCx5M1 and ACCx6 tumors.
