# Supplementary material for: AL101, a gamma-secretase inhibitor, has potent antitumor activity against adenoid cystic carcinoma with activated NOTCH signaling
Source: Cell Death Dis. 2022 Aug 5;13(8):678. doi: 10.1038/s41419-022-05133-9 (PMC9355983; doi:10.1038/s41419-022-05133-9)
Supplement: Supplementary file 10 — Supplementary Table 1 [file 41419_2022_5133_MOESM10_ESM.pdf]

| DB                             | ID            | Pathway/Gene-set name          | Genes                                                                                                                                                                                                                                                                                                                                                                                                                                                                                                                                                                                                                                                                                                                                                                                                                                                                                                                                                                                                                                                                                                                                                                                                                                                                                                                                                                                                                                                                                                                                                                                                                                                                                                | # genes |
|--------------------------------|---------------|--------------------------------|------------------------------------------------------------------------------------------------------------------------------------------------------------------------------------------------------------------------------------------------------------------------------------------------------------------------------------------------------------------------------------------------------------------------------------------------------------------------------------------------------------------------------------------------------------------------------------------------------------------------------------------------------------------------------------------------------------------------------------------------------------------------------------------------------------------------------------------------------------------------------------------------------------------------------------------------------------------------------------------------------------------------------------------------------------------------------------------------------------------------------------------------------------------------------------------------------------------------------------------------------------------------------------------------------------------------------------------------------------------------------------------------------------------------------------------------------------------------------------------------------------------------------------------------------------------------------------------------------------------------------------------------------------------------------------------------------|---------|
| PathwayCommons                 | --            | NOTCH "controls-expression-of" | ACTA2, AKT1, APC, AXIN1, CCND1, CDH1, CDKN1A, CIR1, CTNNB1, DLGAP5, EGFR, FAPB7, FCER2, FLT4, FOS, GATA3, GLI1, GZMB, H3F3A, H3F3B, HES1, HES5, HEY1, HEY2, HEYL, HIST1H3A, HIST1H3B, HIST1H3C, HIST1H3D, HIST1H3E, HIST1H3F, HIST1H3G, HIST1H3I, HIST1H3J, HIST2H3A, HIST2H3C, HIST2H3D, IL4, JUN, MMP2, MYC, NCOR2, NKX2-1, NOTCH1, NOTCH2, NOTCH3, NOTCH4, NTRK1, NUMB, NUMBL, PAQR4, PARP1, PAX8, PBRM1, PEBX1, PCOM1, PCMT1, PDIA6, PDS5A, PHF8, PIK3CA, PIK3CG, PIK3R1, PIK3R2, PIN1, PLAU, PLXND1, POFUT1, POLR2A, POU2AF1, PPA, PPF2CA, PPF2CB, PPF2R1A, PPF2R2A, PPF6R1, PPF6R3, PRKAA1, PRKCD, PRKDC, PRPF19, PRPF6, PRPF8, PRR20D, PSEN1, PSEN2, PSMA1, PSMB1, PSMC3IP, PTBP1, PTPB3, PTPCRA, RAB5A, RAB7A, RABGGTB, RANBP10, RANBP9, RB1, RBBP4, RBM10, RBP3, RBPJ, RBPJL, RBX1, RDX, REL, RELA, RET, RFC1, RFC4, RFX1, RHOA, RFK1, RING1, RMC1, RM2, RND3, RNF2, RNF4, RNF40, ROCK1, RPS27A, RPS6KB1, RTRAF, RUNK1, RUNK3, SART1, SCAMP2, SCGB3A1, SEC24C, SIN3A, SIRT6, SKP1, SKP2, SLC20A1, SLC39A1, SLC5A5, SLFN11, SLFN5, SMAD1, SMAD2, SMAD3, SMAD4, SMAD9, SMARCA4, SMARCA5, SMARCC1, SMARCC2, SMICA, SMC3, SMCHD1, SNAI1, SNV1, SNX19, SORBS3, SPEN, SPTLC2, SOSTM1, SRRT, ST14, STA1, STA13, STK38, STRAP, STUB1, SUPT16H, SUPT6H, TAB1, TACC3, TBL1XR1, TCF12, TFDPI, TFDPO2, TGNL2, TJP1, TLE3, TMEM108, TMEM17, TNNT2, TNPO1, TNRC6A, TNRC6B, TNRC6C, TOP2B, TP53, TPT1, TRAPPC10, TRAPPC9, TRIM25, TRIM28, TRIM3, TRIM32, TSPAN3, UBA52, UBB, UBC, USP11, USP12, USP15, USP7, VASN, VAV1, VEGFA, VPS11, VPS39, WDR11, WDR12, WDR25, WDR6, WIZ, WWC1, WWP1, WWP2, WWTR1, XIAP, XKR8, XP05, XRC06, YBX1, YWHAZ, YY1, ZBED4, ZBTB2, ZFP41, ZMIZ1, ZNF224, ZNF408, ZNF598, ZNF8 | 231     |
| KEGG                           | KEGG:hsa04330 | "NOTCH signaling pathway"      | ADAM17, APH1A, CIR1, CREBBP, CTBP1, CTBP2, DLL1, DLL3, DLL4, DTX1, DTX2, DTX3, DTX3L, DTX4, DVL1, DVL2, DVL3, EF300, HDAC1, HDAC2, HES1, HES5, JAG1, JAG2, KAT2A, KAT2B, LFNG, MAML1, MAML2, MAML3, MFNG, NCOR2, NCSTN, NOTCH1, NOTCH2, NOTCH3, NOTCH4, NUMB, NUMBL, PSEN1, PSEN2, PSENEN, PTCRA, RBPJ, RBPJL, RFNG, SNW1                                                                                                                                                                                                                                                                                                                                                                                                                                                                                                                                                                                                                                                                                                                                                                                                                                                                                                                                                                                                                                                                                                                                                                                                                                                                                                                                                                            | 47      |
| PID                            | MsigDB:M17    | "NOTCH pathway"                | ADAM10, ADAM12, APH1A, APH1B, CBL, CCND1, CDKN1A, CNTN1, CNTN6, CTBP1, CUL1, DLK1, DLL1, DLL3, DLL4, DNER, DNMI, DTX1, ENO1, EP300, EPS15, FBXW7, FURIN, GATA3, HDAC1, IL4, ITC4, JAG1, JAG2, KDM1A, LNX1, MAML1, MAML2, MARK2, MFAP2, MFAF5, MB1, MYC, MYCBP, NCOR1, NCOR2, NCSTN, NEURL1, NOTCH1, NOTCH2, NOTCH3, NOTCH4, NUMB, PSEN1, PSENEN, PTCRA, RAB11A, RBBP8, RBPJ, SKP1, SKP2, SPEN, SSPO, YY1                                                                                                                                                                                                                                                                                                                                                                                                                                                                                                                                                                                                                                                                                                                                                                                                                                                                                                                                                                                                                                                                                                                                                                                                                                                                                             | 59      |
| MsigDB                         | MsigDB:M15592 | NGUYEN_NOTCH1_TARGETS_UP       | ABCC8, ANXA6, ARL6IP5, BRCA1, CANX, CD4, CNTN1, COL18A1, F2R, FLOT1, HDAC1, HMGR, ITGA9, LAMB2, NQO1, PCF11, PHB2, PSDM10, PTHLH, RBP1, S100A13, SEC82, SFPQ, SLC12A3, SLC3A1, SLC4A3, STAT5A, TAGLN, TCAP                                                                                                                                                                                                                                                                                                                                                                                                                                                                                                                                                                                                                                                                                                                                                                                                                                                                                                                                                                                                                                                                                                                                                                                                                                                                                                                                                                                                                                                                                           | 29      |
| MsigDB                         | MsigDB:M14650 | NGUYEN_NOTCH1_TARGETS_DOWN     | AANAT, APEX1, ASS1, BASP1, BET1, BRD2, CADM1, CCN1, CDK11A, COL11A2, COL7A1, CYP, CYX2E1, CYR161, DAXX, DDAH2, DYNCNH1, EEF1A1, EEF1A2, EFHA4, EROC5, ETS2, EXT1, F3, FNDCA3, GADD45B, GARS, GTF21, HERPUD1, HPCAL1, HTRA2, HUWE1, IGF1R, ILT1, IGF1, ILK4, ILK5, LAMA5, LIMK2, MAROKS, MEF2A, MGAT2, MTHFD2, MYC, MYO1E, NET1, NOP2, PBX3, PCDH7, PDEBA, PNN, PNF, PPF2R1B, PSMB9, PSME4, PTGS2, PTPN13, RBMS1, REV3L, RGS2, RING1, RPE, SERP1, SERPINH1, SGM3, SLC12A2, SLC12A4, SLC21A4, SMDY5, SRPK2, STG2, TAR8, TFA2P4, TFG2, TFA52, TP53, TP63, TPIAP, TNFSF4, TP53, TRIO, TRIP12, UBRA4, USP22                                                                                                                                                                                                                                                                                                                                                                                                                                                                                                                                                                                                                                                                                                                                                                                                                                                                                                                                                                                                                                                                                               | 84      |
| MsigDB                         | MsigDB:M1869  | VILIMAS_NOTCH1_TARGETS_UP      | BCL2A1, BIRC2, BIRC3, CARD11, CCL5, CCR7, CD2, CD28, CD3D, CD3G, CD69, CD7, CD74, CD80, CD83, CD86, CTLA4, CX3CL1, DDR1, DTX1, EGR1, EGR2, GATA3, GZMA, GZMB, HEY1, ICAM1, ID2, IL10RA, IL12B, RIF7, JUNB, LAT, LCK, NFATC1, NFKB2, NFKBIA, NOTCH3, NRARP, P2RY10, PTCRA, RAG1, RAG2, RELB, RRAS2, TARP, THY1, TNFRSF18, TOX, TRAF1, TRAF1, TRAF7                                                                                                                                                                                                                                                                                                                                                                                                                                                                                                                                                                                                                                                                                                                                                                                                                                                                                                                                                                                                                                                                                                                                                                                                                                                                                                                                                    | 52      |
| MsigDB                         | MsigDB:M1873  | VILIMAS_NOTCH1_TARGETS_DOWN    | BTX, CAMP, COL15, CLEC10A, CNA1, CSF1R, CSF2RA, CSF3R, CTSG, FCGR2B, GF11, GF11B, ITGAM, ITGB2, LILRB3, LRRRC25, LY2, MAFK, MPO, NOF2, NCF4, PGLYRP1, STOM, TSPASB1, TREM2, TREM1, VPREB1                                                                                                                                                                                                                                                                                                                                                                                                                                                                                                                                                                                                                                                                                                                                                                                                                                                                                                                                                                                                                                                                                                                                                                                                                                                                                                                                                                                                                                                                                                            | 27      |
| Manually curated NOTCH targets | --            | Manually curated NOTCH targets | NOTCH1, NOTCH2, NOTCH3, NOTCH4, MYC, HES1, HES2, HES4, HES5, HES6, HEY1, HEY2, HEYL, NRARP, KIT, MVP, OLFML6, CBR6, CCND1, CDKN1B, CDKN2D                                                                                                                                                                                                                                                                                                                                                                                                                                                                                                                                                                                                                                                                                                                                                                                                                                                                                                                                                                                                                                                                                                                                                                                                                                                                                                                                                                                                                                                                                                                                                            | 21      |

**Supplementary Table 1.** List of 478 NOTCH related genes generated using pathways defined in KEGG, PID, MSigDB and PathwayCommons databases as well as manually curated NOTCH targets.
